# Supplementary material for: Lipid-lowering drug and complement factor H genotyping–personalized treatment strategy for age-related macular degeneration
Source: PubMed Central journal article supplement — iScience. 2024 Nov 8;27(12):111344. doi: 10.1016/j.isci.2024.111344 (PMC11618023; doi:10.1016/j.isci.2024.111344), 2024-11-08
Supplement: mmc1.pdf [file mmc1.pdf]

**Supplemental information**

**Lipid-lowering drug and complement factor H  
genotyping–personalized treatment strategy  
for age-related macular degeneration**

**Can Can Xue, Kelvin Y.C. Teo, Yih Chung Tham, Hengtong Li, Sahil Thakur, Charumathi Sabanayagam, Qiao Fan, David L. Silver, Xiaomeng Wang, Chui Ming Gemmy Cheung, Tien Yin Wong, Usha Chakravarthy, Ching-Yu Cheng, and Simon Nusinovi**

## **Supplemental information**

### **Lipid-lowering drug and complement factor H genotyping–personalized treatment strategy for age-related macular degeneration**

Can Can Xue, PhD, Kelvin YC Teo, PhD, Yih Chung Tham, PhD, Hengtong Li, MSc, Sahil Thakur, MS, Charumathi Sabanayagam, PhD, Qiao Fan, PhD, David L. Silver, PhD, Xiaomeng Wang, PhD, Chui Ming Gemmy Cheung, FRCOphth, Tien Yin Wong, PhD, Usha Chakravarthy, PhD, Ching-Yu Cheng, PhD, Simon Nusinovici, PhD

Methods S1. Inverse treatment probability weights (IPTW) distribution before and after truncation at the 99th percentile by lipid-lowering drug status in the SEED Population, related to STAR Methods.

Table S1. Characteristics of the Singapore Epidemiology of Eye Diseases (SEED) population according to AMD incidence or progression status.

Table S2. Characteristics of the UK Biobank population according to AMD incidence.

Table S3. Effect of lipid-lowering drug on AMD incidence and progression according to the complement genetic variants in Singapore Epidemiology of Eye Diseases (SEED) study.

Table S4. Effect of lipid-lowering drug on the incidence of AMD in UK Biobank.

Table S5. Effects of lipoprotein sub-fractions on AMD prevalence (A) and effect of lipid-lowering drug on lipoprotein sub-fractions according to the rs1061170 genetic variant (B) in UK Biobank study.

Table S6. AMD status and AMD features at the baseline visit of the Singapore Epidemiology of Eye Diseases population based on Beckman classification.

Table S7. List of the complement genetic variants considered.

Table S8. List of the lipoprotein sub-fractions considered.

Figure S1. Effect of lipid-lowering drug on incidence of AMD in UK Biobank.

Figure S2. Absolute standardized differences (ASD) before (unadjusted) and after weighting.

Figure S3. Propensity score according to lipid-lowering drug and absolute standardized differences (ASD) for each covariates according to the methods used to correct for confounding.

**Methods S1.** Inverse treatment probability weights (IPTW) distribution before and after truncation at the 99<sup>th</sup> percentile by lipid-lowering drug status in the SEED Population, related to STAR Methods.

- A) Raw truncated (99<sup>th</sup> percentile) ITPW according to the lipid-lowering drug status
- B) Truncated (99<sup>th</sup> percentile) ITPW according to the lipid-lowering drug status

Because the inverse treatment probability weights (IPTW) can lead to extreme weight values, it is common practice to truncate the distribution to the 99<sup>th</sup> percentile.<sup>1</sup> The Figure below shows (A) raw and (B) truncated (99<sup>th</sup> percentile) ITPW according to the lipid-lowering drug status. These weights have been estimated in the overall Singapore Epidemiology of Eye Diseases (SEED) population. Furthermore, due to the presence of weights in the multivariable models, the standard errors were estimated using a robust sandwich variance estimator. Absolute standardized differences were calculated before and after weighting to check the reduction in bias (**Figure S2 and Figure S3**).

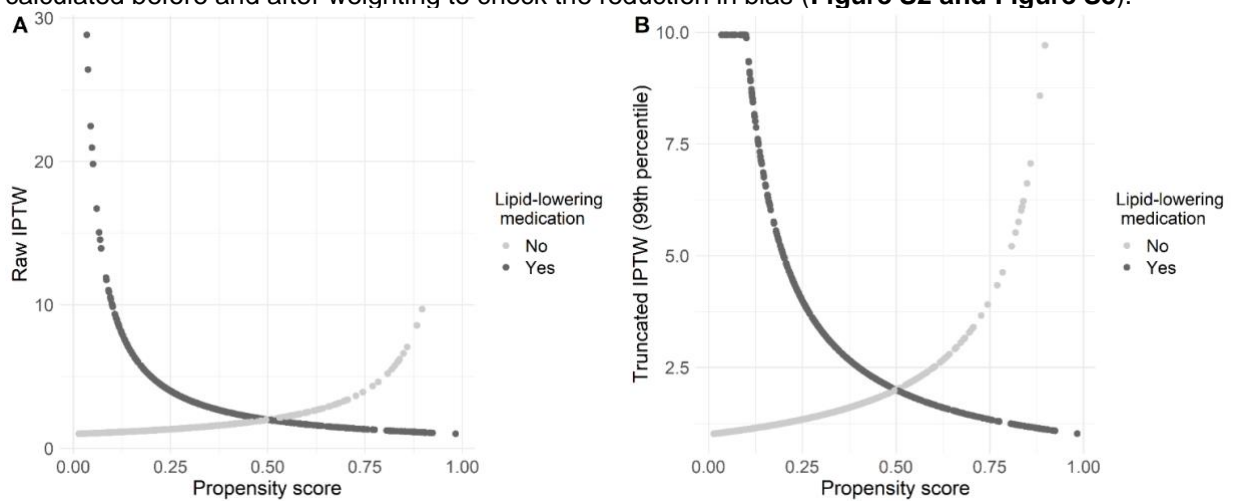

1. Austin PC, Stuart EA. Moving towards best practice when using inverse probability of treatment weighting (IPTW) using the propensity score to estimate causal treatment effects in observational studies. *Stat Med.* 2015;34(28):3661-3679. doi:10.1002/sim.6607

Table S1. Characteristics of the Singapore Epidemiology of Eye Diseases (SEED) population according to AMD incidence or progression status

|                                       | No incident AMD<br>n=2,102 | Incident AMD<br>n=484 | <i>P</i> -value | No progression<br>n=1,404 | Progression<br>n=216 | <i>P</i> -value |
|---------------------------------------|----------------------------|-----------------------|-----------------|---------------------------|----------------------|-----------------|
| Lipid lowering drug, n (%)            | 402 (19.1)                 | 119 (24.6)            | 0.007           | 357 (25.4)                | 57 (26.4)            | 0.763           |
| Age, years, median (IQR)              | 51.7 (47.5, 57.5)          | 55.9 (49.8, 63.0)     | <0.001          | 59.5 (52.3, 66.2)         | 61.1 (53.4, 68.7)    | 0.105           |
| Female, n (%)                         | 1132 (53.9)                | 232 (47.93)           | 0.019           | 646 (46.0)                | 113 (52.3)           | 0.084           |
| Ethnicity, n (%)                      |                            |                       | 0.001           |                           |                      | 0.035           |
| Chinese                               | 812 (38.6)                 | 208 (43.0)            |                 | 582 (41.5)                | 70 (32.4)            |                 |
| Indian                                | 754 (35.9)                 | 132 (27.3)            |                 | 386 (27.5)                | 65 (30.1)            |                 |
| Malay                                 | 536 (25.5)                 | 144 (29.8)            |                 | 436 (31.1)                | 81 (37.5)            |                 |
| Hypertension, n (%)                   | 1,040 (49.5)               | 295 (61.0)            | <0.001          | 908 (64.7)                | 144 (66.7)           | 0.567           |
| Diabetes, n (%)                       | 427 (20.31)                | 110 (22.7)            | 0.238           | 382 (27.2)                | 61 (28.2)            | 0.751           |
| BMI, kg/m <sup>2</sup> , median (IQR) | 24.8 (22.3, 27.9)          | 24.9 (22.8, 28.1)     | 0.601           | 24.9 (22.2, 27.5)         | 25.75 (22.9, 28.5)   | 0.012           |
| Smoking status, n (%)                 |                            |                       | 0.047           |                           |                      | 0.803           |
| Never smoked                          | 1,556 (74.0)               | 339 (70.0)            |                 | 974 (69.4)                | 151 (69.9)           |                 |
| Current smoker                        | 309 (14.7)                 | 71 (14.7)             |                 | 213 (15.2)                | 35 (16.2)            |                 |
| Past smoker                           | 237 (11.3)                 | 74 (15.3)             |                 | 217 (15.5)                | 30 (13.9)            |                 |
| CVD, n (%)                            | 150 (7.1)                  | 31 (6.4)              | 0.570           | 124 (8.83)                | 25 (11.6)            | 0.194           |
| Education level, n (%)                |                            |                       | 0.011           |                           |                      | 0.084           |
| No or primary only                    | 939 (44.7)                 | 247 (51.0)            |                 | 890 (63.4)                | 150 (69.4)           |                 |
| More than primary                     | 1,163 (55.3)               | 237 (48.9)            |                 | 514 (36.6)                | 66 (30.6)            |                 |
| rs1061170 genetic variant, n (%)      |                            |                       | 0.226           |                           |                      | 0.148           |
| TT                                    | 1,577 (75.0)               | 380 (78.5)            |                 | 1,119 (79.7)              | 162 (75.0)           |                 |
| CT                                    | 463 (22.0)                 | 94 (19.4)             |                 | 243 (17.3)                | 49 (22.7)            |                 |
| CC                                    | 62 (3.0)                   | 10 (2.1)              |                 | 42 (3.0)                  | 5 (2.3)              |                 |

IQR: inter quartile range; BMI: body mass index; CVD: cardiovascular disease

Table S2. Characteristics of the UK Biobank population according to AMD incidence

|                                       | No incident AMD    | Incident AMD       | <i>P</i> -value |
|---------------------------------------|--------------------|--------------------|-----------------|
|                                       | n=444,814          | n=913              |                 |
| Lipid lowering drug, n (%)            | 76,595 (17.2)      | 271 (29.7)         | < 0.001         |
| Age, years, median (IQR)              | 58.0 (50.0, 63.0)  | 64.0 (60.0, 67.0)  | < 0.001         |
| Female, n (%)                         | 241,063 (54.2)     | 530 (58.1)         | 0.020           |
| Ethnicity, n (%)                      |                    |                    | 0.287           |
| Other                                 | 25,121 (5.7)       | 59 (6.5)           |                 |
| White                                 | 419,693 (94.4)     | 854 (93.5)         |                 |
| Diastolic BP, mmHg, median (IQR)      | 82 (75.0, 89.0)    | 81 (74.0, 88.0)    | 0.005           |
| Systolic BP, mmHg, median (IQR)       | 138 (126.0, 152.0) | 143 (130.0, 157.0) | < 0.001         |
| Diabetes, n (%)                       | 22,898 (52.0)      | 107 (11.7)         | < 0.001         |
| BMI, kg/m <sup>2</sup> , median (IQR) | 26.7 (24.1, 29.9)  | 27.1 (24.3, 30.4)  | 0.014           |
| Smoking, n (%)                        |                    |                    | < 0.001         |
| Never                                 | 243,735 (54.8)     | 431 (47.2)         |                 |
| Previous                              | 154,617 (34.8)     | 419 (45.9)         |                 |
| Current                               | 46,462 (10.5)      | 63 (6.9)           |                 |
| CVD, n (%)                            | 9,065 (2.0)        | 177 (19.4)         | < 0.001         |
| Household income, n (%)               |                    |                    | < 0.001         |
| Less than £30,999                     | 182,864 (41.1)     | 451 (49.4)         |                 |
| Greater than £31,000                  | 199,232 (44.8)     | 311 (34.1)         |                 |
| Don't want to say                     | 62,718 (14.1)      | 151 (16.5)         |                 |
| CFH rs1061170, n (%)                  |                    |                    | < 0.001         |
| TT                                    | 171,598 (38.6)     | 295 (32.3)         |                 |
| CT                                    | 208,745 (46.9)     | 385 (42.2)         |                 |
| CC                                    | 64,471 (14.5)      | 233 (25.5)         |                 |

IQR: inter quartile range; BP: blood pressure; BMI: body mass index; CVD: cardiovascular disease

Table S3. Effect of lipid-lowering drug on AMD incidence and progression according to the complement genetic variants in Singapore Epidemiology of Eye Diseases (SEED) study

| Outcome          | SNP (gene)        | allele          | n     | method | OR (95%CI)          | P-value           |       |
|------------------|-------------------|-----------------|-------|--------|---------------------|-------------------|-------|
| Incidence        | rs7523273 (CD46)  | AA              | 1,981 | ITPW   | 1.03 (0.71, 1.49)   | 0.886             |       |
|                  |                   | AA              | 1,981 | OW     | 1.16 (0.84, 1.60)   | 0.360             |       |
|                  |                   | GA/GG           | 605   | ITPW   | 0.52 (0.27, 1.00)   | 0.050             |       |
|                  |                   | GA/GG           | 605   | OW     | 0.69 (0.37, 1.28)   | 0.237             |       |
|                  | rs41347947 (CD93) | CC              | 2,498 | ITPW   | 0.84 (0.60, 1.16)   | 0.282             |       |
|                  |                   | CC              | 2,498 | OW     | 1.01 (0.76, 1.35)   | 0.940             |       |
|                  |                   | AC              | 88    | ITPW   | 6.51 (1.42, 29.99)  | 0.016             |       |
|                  |                   | AC              | 88    | OW     | 18.6 (1.99, 173.71) | 0.010             |       |
|                  | rs10033900 (CFI)  | TT              | 1,115 | ITPW   | 0.60 (0.37, 0.97)   | 0.037             |       |
|                  |                   | TT              | 1,115 | OW     | 0.87 (0.55, 1.37)   | 0.534             |       |
|                  |                   | TC              | 1,158 | ITPW   | 1.08 (0.68, 1.73)   | 0.740             |       |
|                  |                   | TC              | 1,158 | OW     | 1.13 (0.74, 1.72)   | 0.567             |       |
|                  |                   | CC              | 313   | ITPW   | 0.98 (0.48, 1.98)   | 0.947             |       |
|                  |                   | CC              | 313   | OW     | 1.26 (0.61, 2.61)   | 0.535             |       |
|                  | Progression       | rs1061170 (CFH) | TT    | 1,281  | ITPW                | 1.00 (0.64, 1.56) | 0.983 |
|                  |                   |                 | TT    | 1,281  | OW                  | 1.09 (0.72, 1.66) | 0.688 |
|                  |                   |                 | CT/CC | 339    | ITPW                | 0.41 (0.19, 0.87) | 0.020 |
|                  |                   |                 | CT/CC | 339    | OW                  | 0.45 (0.22, 0.96) | 0.039 |
| rs11080055 (VTN) |                   | AA              | 629   | ITPW   | 0.81 (0.45, 1.47)   | 0.487             |       |
|                  |                   | AA              | 629   | OW     | 1.04 (0.57, 1.91)   | 0.893             |       |
|                  |                   | CA              | 724   | ITPW   | 1.02 (0.57, 1.84)   | 0.942             |       |
|                  |                   | CA              | 724   | OW     | 1.02 (0.60, 1.73)   | 0.941             |       |
|                  |                   | CC              | 267   | ITPW   | 0.27 (0.10, 0.75)   | 0.012             |       |
|                  |                   | CC              | 267   | OW     | 0.43 (0.15, 1.21)   | 0.110             |       |

ITPW: inverse treatment probability weighting; OW: overlap weights

These effects are expressed as odds ratios (OR) with their 95% confidence intervals (CI). The genetic variants presented here, are those, among the 20 initially considered, for which lipid-lowering drug had a significant effect with at least one method (ITPW or OW).

Table S4. Effect of lipid-lowering drug on the incidence of AMD in UK Biobank.

| SNP (gene)        | allele | n       | method | HR (95%CI)        | P-value |
|-------------------|--------|---------|--------|-------------------|---------|
| rs7523273 (CD46)  | AA     | 204,713 | ITPW   | 0.92 (0.69, 1.22) | 0.558   |
|                   | AA     | 204,713 | OW     | 0.84 (0.66, 1.07) | 0.160   |
|                   | GA/GG  | 241,014 | ITPW   | 0.91 (0.71, 1.17) | 0.462   |
|                   | GA/GG  | 241,014 | OW     | 0.90 (0.71, 1.13) | 0.348   |
| rs41347947 (CD93) | CC     | 443,542 | ITPW   | 0.92 (0.76, 1.11) | 0.390   |
|                   | CC     | 443,542 | OW     | 0.88 (0.74, 1.04) | 0.122   |
| rs10033900 (CFI)  | TT     | 119,444 | ITPW   | 0.86 (0.59, 1.24) | 0.415   |
|                   | TT     | 119,444 | OW     | 0.84 (0.61, 1.17) | 0.305   |
|                   | TC     | 221,688 | ITPW   | 1.01 (0.78, 1.31) | 0.936   |
|                   | TC     | 221,688 | OW     | 0.95 (0.75, 1.20) | 0.652   |
|                   | CC     | 104,595 | ITPW   | 0.79 (0.53, 1.17) | 0.233   |
|                   | CC     | 104,595 | OW     | 0.74 (0.53, 1.04) | 0.086   |
| rs1061170 (CFH)   | TT     | 171,893 | ITPW   | 1.14 (0.83, 1.57) | 0.416   |
|                   | TT     | 171,893 | OW     | 1.04 (0.79, 1.38) | 0.760   |
|                   | CT     | 209,130 | ITPW   | 0.89 (0.67, 1.20) | 0.456   |
|                   | CT     | 209,130 | OW     | 0.85 (0.66, 1.11) | 0.230   |
|                   | CC     | 64,704  | ITPW   | 0.65 (0.45, 0.93) | 0.019   |
|                   | CC     | 64,704  | OW     | 0.67 (0.47, 0.96) | 0.027   |
| rs11080055 (VTN)  | AA     | 120,023 | ITPW   | 1.04 (0.73, 1.50) | 0.814   |
|                   | AA     | 120,023 | OW     | 0.89 (0.65, 1.22) | 0.488   |
|                   | CA     | 221,483 | ITPW   | 0.84 (0.64, 1.10) | 0.202   |
|                   | CA     | 221,483 | OW     | 0.80 (0.63, 1.02) | 0.073   |
|                   | CC     | 104,221 | ITPW   | 0.92 (0.63, 1.35) | 0.684   |
|                   | CC     | 104,221 | OW     | 0.97 (0.69, 1.36) | 0.871   |

ITPW: inverse treatment probability weighting; OW: overlap weights

These effects are expressed as hazard ratios (HR) with their 95% confidence intervals (CI). The genetic variants presented here, are, among the 20 considered, those for which lipid-lowering drug had a significant effect on AMD incidence or progression in SEED study.



Table S5. Effects of lipoprotein sub-fractions on AMD prevalence (A) and effect of lipid-lowering drug on lipoprotein sub-fractions according to the rs1061170 genetic variant (B) in UK Biobank study

Table S5 A. Effect of lipoprotein sub-fractions on AMD prevalence

| Lipoprotein sub-fractions | allele | OR (95% CI)        | <i>P</i> -value | <i>P</i> -interaction |
|---------------------------|--------|--------------------|-----------------|-----------------------|
| XL_HDL_TG                 | TT     | 0.92 (0.81, 1.04)  | 0.188           | 0.002                 |
|                           | CT     | 1.01 (0.91, 1.13)  | 0.781           |                       |
|                           | CC     | 1.18 (1.02, 1.37)  | 0.025           |                       |
| L_HDL_TG                  | TT     | 0.92 (0.81, 1.04)  | 0.185           | 0.001                 |
|                           | CT     | 1.01 (0.91, 1.12)  | 0.856           |                       |
|                           | CC     | 1.16 (1.001, 1.34) | 0.047           |                       |

Table S5 B. Effect of lipid-lowering drug on lipoprotein sub-fractions

| Lipoprotein sub-fractions | allele | $\beta$ (95% CI)     | <i>P</i> -value | <i>P</i> -interaction |
|---------------------------|--------|----------------------|-----------------|-----------------------|
| XL_HDL_TG                 | TT     | -0.19 (-0.24, -0.14) | <0.001          | <0.001                |
|                           | CT     | -0.22 (-0.25, -0.19) | <0.001          |                       |
|                           | CC     | -0.22 (-0.25, -0.18) | <0.001          |                       |
| L_HDL_TG                  | TT     | -0.05 (-0.10, 0.00)  | 0.064           | <0.001                |
|                           | CT     | -0.08 (-0.11, -0.05) | <0.001          |                       |
|                           | CC     | -0.09 (-0.12, -0.06) | <0.001          |                       |

IDL\_TG = triglycerides in intermediate density lipoprotein; L\_HDL\_TG = triglycerides in large high density lipoprotein; XL\_HDL\_TG = triglycerides in very large high density lipoprotein; XS\_VLDL\_PL = phospholipids in very small very-low density lipoprotein

Table S6. AMD status and AMD features at the baseline visit of the Singapore Epidemiology of Eye Diseases population based on Beckman classification

| Age, years | N    | No AMD            | Early AMD           | Intermediate AMD     | Late AMD            |
|------------|------|-------------------|---------------------|----------------------|---------------------|
| All        | 5608 | 3,449 (61.5%)     | 1,004 (17.9%)       | 1,129 (20.1%)        | 26 (0.5%)           |
| 40-54      | 2919 | 2,182 (74.8%)     | 420 (14.4%)         | 315 (10.8%)          | 2 (0.1%)            |
| 55-64      | 1698 | 920 (54.2%)       | 355 (20.9%)         | 417 (24.6%)          | 6 (0.4%)            |
| 65-74      | 806  | 293 (36.4%)       | 190 (23.6%)         | 317 (39.3%)          | 6 (0.7%)            |
| 75+        | 185  | 54 (29.2%)        | 39 (21.1%)          | 80 (43.2%)           | 12 (6.5%)           |
|            |      | <b>No drusen</b>  | <b>Small drusen</b> | <b>Medium drusen</b> | <b>Large drusen</b> |
| All        | 5604 | 622 (11.1%)       | 2,832 (50.5%)       | 1,213 (21.6%)        | 937 (16.7%)         |
| 40-54      | 2919 | 350 (12.0%)       | 1,833 (62.8%)       | 502 (17.2%)          | 234 (8.0%)          |
| 55-64      | 1698 | 163 (9.6%)        | 759 (44.7%)         | 430 (25.3%)          | 346 (20.4%)         |
| 65-74      | 806  | 87 (10.8%)        | 206 (25.6%)         | 229 (28.5%)          | 282 (35.1%)         |
| 75+        | 185  | 22 (12.0%)        | 34 (18.6%)          | 52 (28.4%)           | 75 (41.0%)          |
|            |      | <b>No pigment</b> | <b>Pigment</b>      |                      |                     |
| All        | 5608 | 5,036 (89.8%)     | 572 (10.2%)         |                      |                     |
| 40-54      | 2919 | 2,719 (93.1%)     | 200 (6.9%)          |                      |                     |
| 55-64      | 1698 | 1,486 (87.5%)     | 212 (12.5%)         |                      |                     |
| 65-74      | 806  | 685 (85.0%)       | 121 (15.0%)         |                      |                     |
| 75+        | 185  | 146 (78.9%)       | 39 (21.1%)          |                      |                     |

The distribution in the entire population is given as well as according to the age category

Table S7. List of the complement genetic variants considered

| Gene                         | RS number   | marker      | <i>P</i> -value*        | R <sup>2</sup><br>SEED <sup>#</sup> | R <sup>2</sup><br>UKBB |
|------------------------------|-------------|-------------|-------------------------|-------------------------------------|------------------------|
| FCN3                         | rs139884521 | 1:27794948  | 5.04×10 <sup>-5</sup>   | 0.663                               | 0.990                  |
| C8B                          | rs515477    | 1:57659204  | 5.78×10 <sup>-4</sup>   | 0.995                               | 0.985                  |
| CFH                          | rs1061170   | 1.196659237 | 2.69×10 <sup>-590</sup> | 0.936                               | 1.000                  |
| C4BPA/C4BPB/CD55/<br>CR1/CR2 | rs72742996  | 1:207421807 | 9.47×10 <sup>-6</sup>   | 0.945                               | 0.993                  |
| CD46                         | rs7523273   | 1:207977083 | 3.24×10 <sup>-4</sup>   | 0.933                               | 0.996                  |
| COLEC11                      | rs7569798   | 2:3640689   | 0.004                   | 0.896                               | 0.977                  |
| CFI                          | rs10033900  | 4:110659067 | 5.35×10 <sup>-17</sup>  | 0.997                               | 1.000                  |
| C2/C4A/C4B/CFB               | rs429608    | 6:31930462  | 1.17×10 <sup>-103</sup> | 0.999                               | 1.000                  |
| CLU                          | rs3757907   | 8:27268688  | 0.001                   | 0.969                               | 0.994                  |
| COLEC10                      | rs6651219   | 8:119876738 | 2.47×10 <sup>-4</sup>   | 0.687                               | 0.996                  |
| C5                           | rs41307968  | 9:123808262 | 3.24×10 <sup>-4</sup>   | 0.981                               | 0.996                  |
| C8G                          | rs10870152  | 9:139867726 | 4.68×10 <sup>-4</sup>   | 0.653                               | 0.955                  |
| CD59                         | rs2901375   | 11:33736575 | 6.01×10 <sup>-4</sup>   | 0.988                               | 0.989                  |
| C1R/C1S                      | rs2301262   | 12:7055860  | 9.19×10 <sup>-5</sup>   | 0.662                               | 0.958                  |
| ITGAX                        | rs4889654   | 16:31420134 | 0.0125                  | 0.924                               | 0.998                  |
| VTN                          | rs11080055  | 17:26649724 | 1.04×10 <sup>-8</sup>   | 1.000                               | 1.000                  |
| CFD/ELANE                    | rs67538026  | 19:1031438  | 2.58×10 <sup>-8</sup>   | 0.698                               | 0.960                  |
| C5AR1                        | rs12980447  | 19:47792585 | 0.001                   | 0.931                               | 0.997                  |
| CD93                         | rs41347947  | 20:23065548 | 0.011                   | 0.798                               | 1.000                  |
| ITGB2                        | rs2235133   | 21:46321172 | 2.86×10 <sup>-4</sup>   | 0.994                               | 1.000                  |

\* obtained from Fritsche LG, Igl W, Bailey JN, et al. A large genome-wide association study of age-related macular degeneration highlights contributions of rare and common variants. Nat Genet 2016  
<sup>#</sup> average values in the three SEED sub-populations (Chinese, Malay and Indians)  
The R<sup>2</sup> values presented are the R<sup>2</sup> imputation for quality assessment estimated in Singapore Epidemiology of Eye Disease (SEED) study and UK Biobank (UKBB)

Table S8. List of the lipoprotein sub-fractions considered

| Lipoprotein sub-fraction                  | Abbreviation | Unit   |
|-------------------------------------------|--------------|--------|
| Concentration of large LDL particles      | L_LDL_P      | mol/l  |
| Total lipids in large LDL                 | L_LDL_L      | mmol/l |
| Phospholipids in large LDL                | L_LDL_PL     | mmol/l |
| Total cholesterol in large LDL            | L_LDL_C      | mmol/l |
| Cholesterol esters in large LDL           | L_LDL_CE     | mmol/l |
| Free cholesterol in large LDL             | L_LDL_FC     | mmol/l |
| Triglycerides in large LDL                | L_LDL_TG     | mmol/l |
| Concentration of medium LDL particles     | M_LDL_P      | mol/l  |
| Total lipids in medium LDL                | M_LDL_L      | mmol/l |
| Phospholipids in medium LDL               | M_LDL_PL     | mmol/l |
| Total cholesterol in medium LDL           | M_LDL_C      | mmol/l |
| Cholesterol esters in medium LDL          | M_LDL_CE     | mmol/l |
| Free cholesterol in medium LDL            | M_LDL_FC     | mmol/l |
| Triglycerides in medium LDL               | M_LDL_TG     | mmol/l |
| Concentration of small LDL particles      | S_LDL_P      | mol/l  |
| Total lipids in small LDL                 | S_LDL_L      | mmol/l |
| Phospholipids in small LDL                | S_LDL_PL     | mmol/l |
| Total cholesterol in small LDL            | S_LDL_C      | mmol/l |
| Cholesterol esters in small LDL           | S_LDL_CE     | mmol/l |
| Free cholesterol in small LDL             | S_LDL_FC     | mmol/l |
| Triglycerides in small LDL                | S_LDL_TG     | mmol/l |
| Concentration of very large HDL particles | XL_HDL_P     | mol/l  |
| Total lipids in very large HDL            | XL_HDL_L     | mmol/l |
| Phospholipids in very large HDL           | XL_HDL_PL    | mmol/l |
| Total cholesterol in very large HDL       | XL_HDL_C     | mmol/l |
| Cholesterol esters in very large HDL      | XL_HDL_CE    | mmol/l |
| Free cholesterol in very large HDL        | XL_HDL_FC    | mmol/l |
| Triglycerides in very large HDL           | XL_HDL_TG    | mmol/l |
| Concentration of large HDL particles      | L_HDL_P      | mol/l  |
| Total lipids in large HDL                 | L_HDL_L      | mmol/l |
| Phospholipids in large HDL                | L_HDL_PL     | mmol/l |
| Total cholesterol in large HDL            | L_HDL_C      | mmol/l |
| Cholesterol esters in large HDL           | L_HDL_CE     | mmol/l |
| Free cholesterol in large HDL             | L_HDL_FC     | mmol/l |
| Triglycerides in large HDL                | L_HDL_TG     | mmol/l |
| Concentration of medium HDL particles     | M_HDL_P      | mol/l  |
| Total lipids in medium HDL                | M_HDL_L      | mmol/l |
| Phospholipids in medium HDL               | M_HDL_PL     | mmol/l |
| Total cholesterol in medium HDL           | M_HDL_C      | mmol/l |
| Cholesterol esters in medium HDL          | M_HDL_CE     | mmol/l |
| Free cholesterol in medium HDL            | M_HDL_FC     | mmol/l |
| Triglycerides in medium HDL               | M_HDL_TG     | mmol/l |
| Concentration of small HDL particles      | S_HDL_P      | mol/l  |
| Total lipids in small HDL                 | S_HDL_L      | mmol/l |
| Phospholipids in small HDL                | S_HDL_PL     | mmol/l |

|                                 |          |        |
|---------------------------------|----------|--------|
| Total cholesterol in small HDL  | S_HDL_C  | mmol/l |
| Cholesterol esters in small HDL | S_HDL_CE | mmol/l |
| Free cholesterol in small HDL   | S_HDL_FC | mmol/l |
| Triglycerides in small HDL      | S_HDL_TG | mmol/l |

---

HDL: high-density lipoprotein; LDL: low-density lipoprotein

Figure S1. Effect of lipid-lowering drug on incidence of AMD in UK Biobank

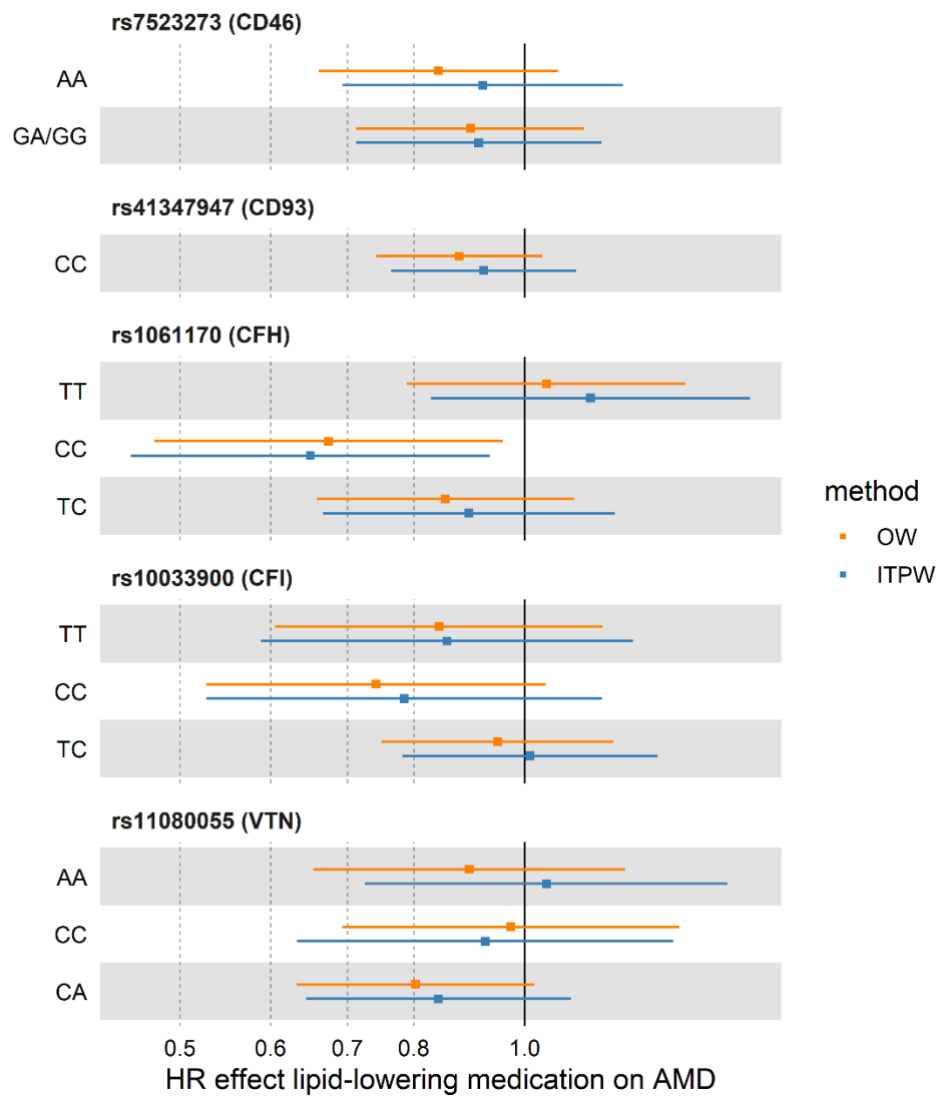

The effects are expressed as HR with their 95% confidence intervals. Two propensity score methods (ITPW and OW) have been used to reduce bias due to the strong observed confounders. The genetic variants presented here are those for which lipid-lowering drugs had a significant effect on AMD in the Singapore Epidemiology of Eye Diseases Study.

AMD: age-related macular degeneration; OW: overlap weights; ITPW: inverse treatment probability weighting; HR: hazards ratio

Figure S2. Absolute standardized differences (ASD) before (unadjusted) and after weighting

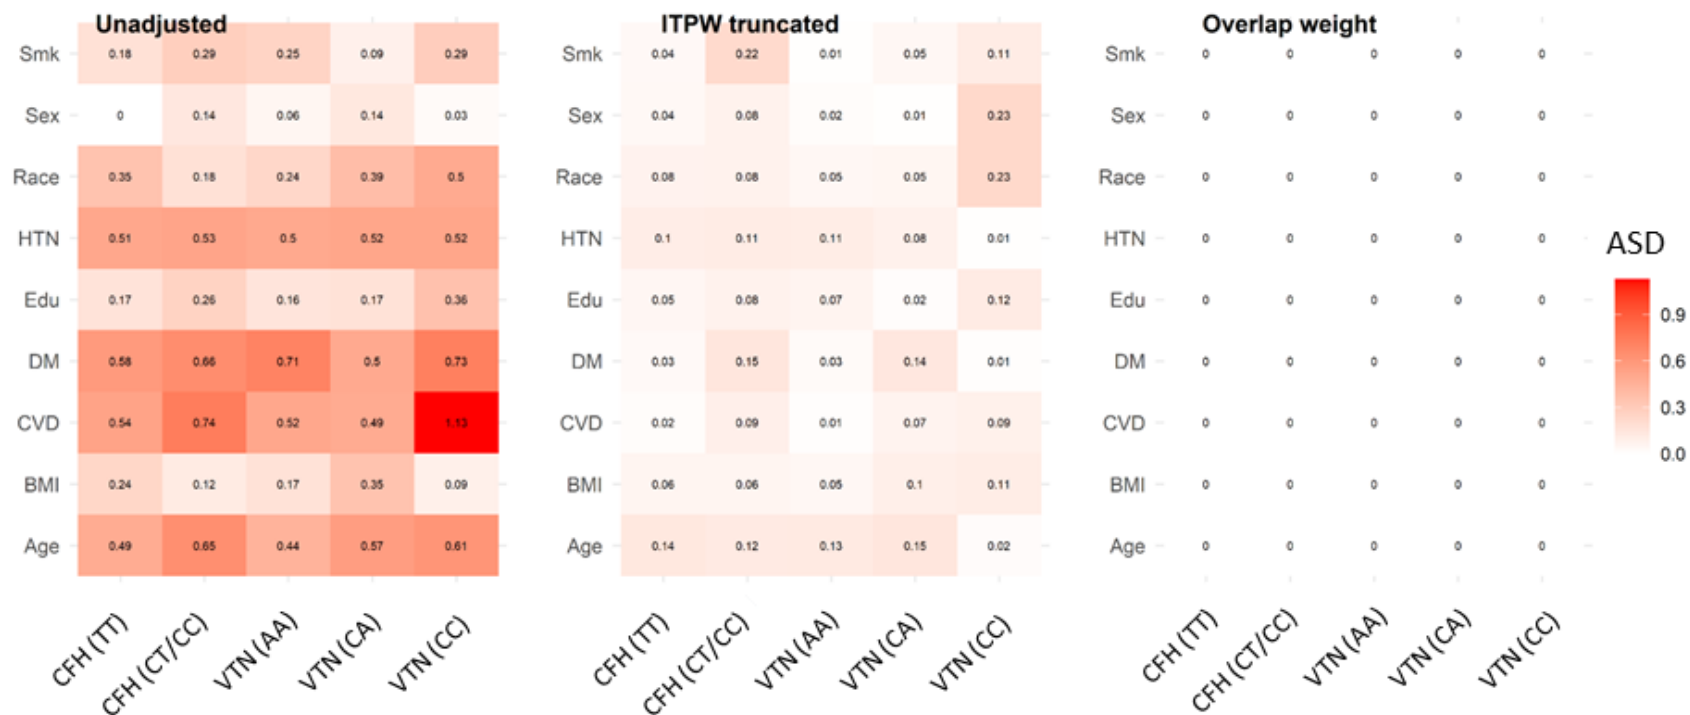

Two types of weights were used: inverse treatment probability weight (ITPW) and overlap weight (OW) for all the adjustment factors considered in the analyses. The standardized differences have been calculated in each stratum of the genetic variant located in the two complement genes CFH and VTN corresponding to the progression analysis in Singapore Epidemiology of Eye Diseases (SEED).

Smk: smoking status; HTN: hypertension; Edu: education; DM: Diabetes; CVD: cardiovascular disease; BMI: body mass index

Figure S3. Propensity score according to lipid-lowering drug and absolute standardized differences (ASD) for each covariates according to the methods used to correct for confounding

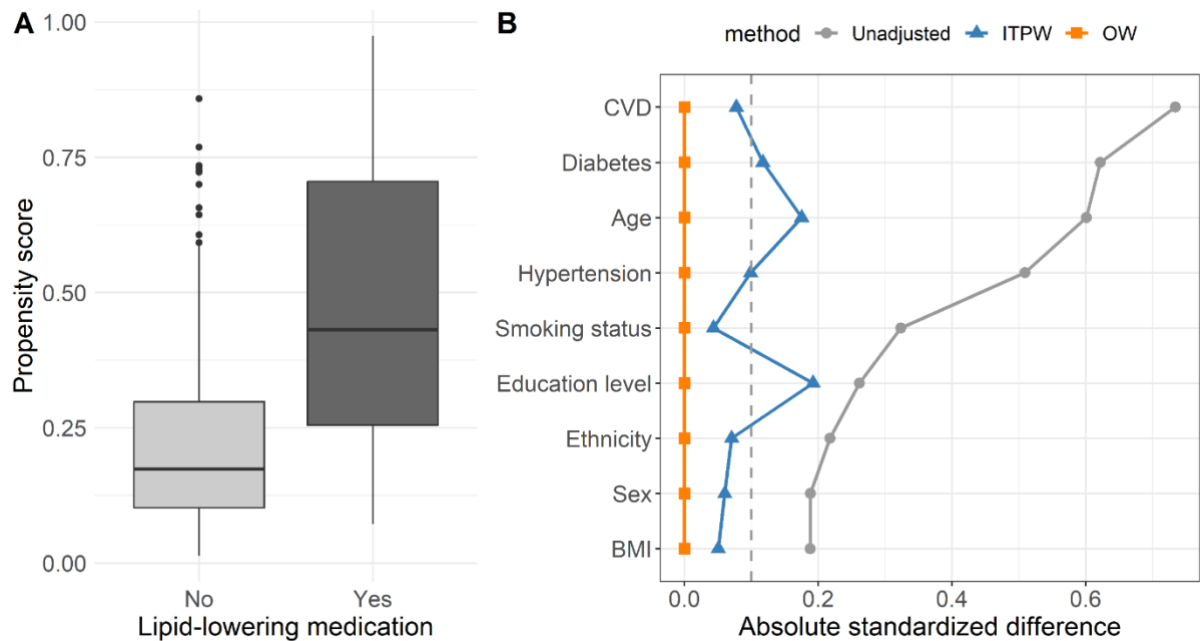

A) Propensity score according to lipid-lowering drug; B) ASD for each covariates according to the methods used to correct for confounding

The propensity score has been calculated based on the covariates in panel B and thus corresponds to the probability of taking statin according to the covariates. These have been calculated for individuals with at least one risk allele for the rs1061170 genetic variant in the progression analysis in Singapore Epidemiology of Eye Diseases study.

ITPW: inverse treatment probability weighting; OW: overlap weights; CVD: cardiovascular disease
